# Supplementary material for: Early and Non-Invasive Detection of Chronic Wasting Disease Prions in Elk Feces by Real-Time Quaking Induced Conversion
Source: PubMed Central journal article supplement (PMC5102397; doi:10.1371/journal.pone.0166187), 2016-11-09
Supplement: pone.0166187.s001.pdf [file pone.0166187.s001.pdf]

# S1 Figure

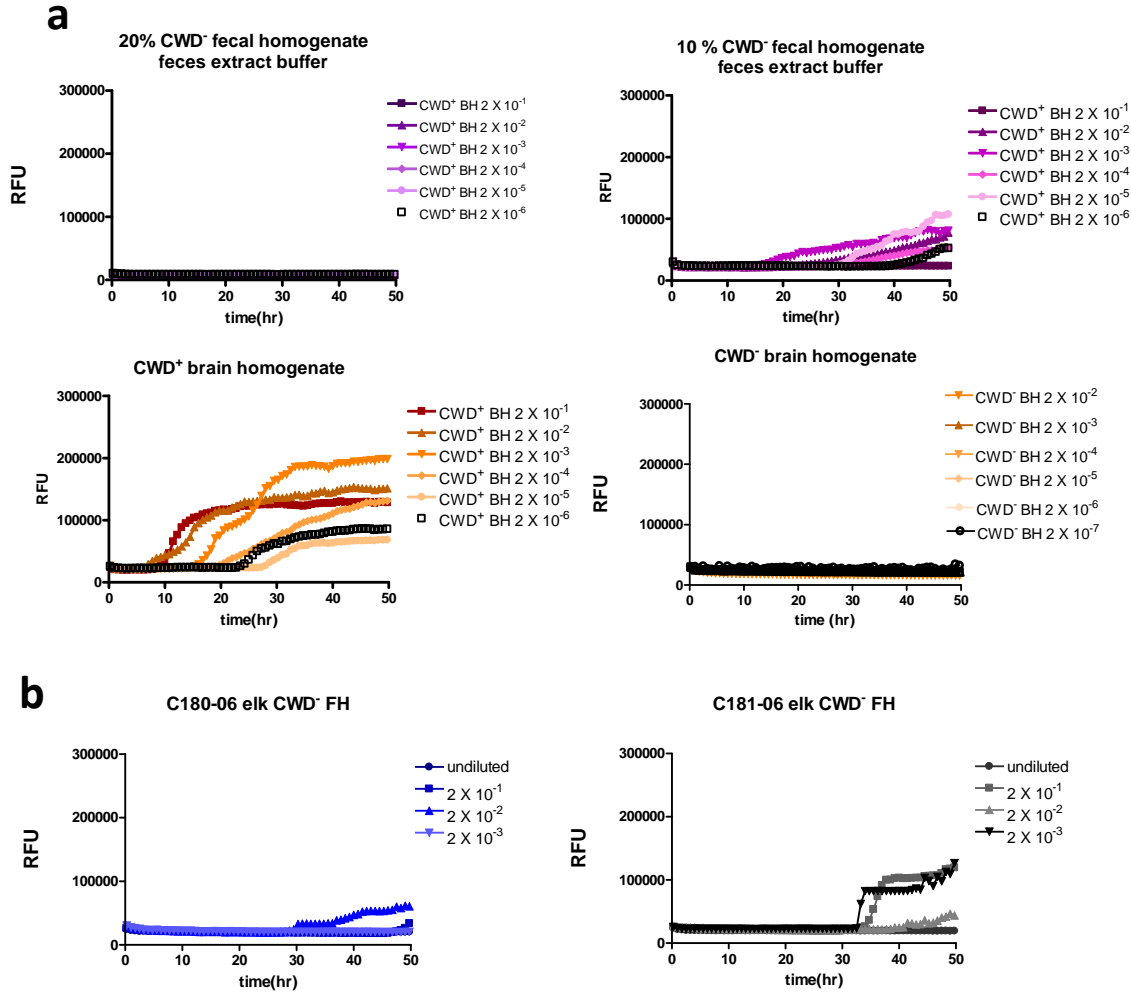

**Fecal homogenate inhibits detection of CWD prions by RT-QuIC.** (a) Twenty or 10 % (w/v) fecal homogenate was prepared in feces extract buffer using samples collected from a CWD-negative elk. The homogenates were spiked with brain homogenate from a CWD-infected elk at a final concentration of 1 %. Aliquots of 10fold serial dilutions thereof as indicated were analysed by RT-QuIC using deer PrP as a substrate. Serial dilutions of CWD-positive or negative brain homogenate served as controls. (b) Serial dilutions of fecal homogenates (10 %) of CWD-negative elk were used to seed RT-QuIC reactions with deer rPrP as a substrate. All assays were performed in quadruplicate, x-axes show the reaction time, y-axes the relative thioflavin T (ThT) fluorescence.
