# Supplementary material for: Early and Non-Invasive Detection of Chronic Wasting Disease Prions in Elk Feces by Real-Time Quaking Induced Conversion
Source: PubMed Central journal article supplement (PMC5102397; doi:10.1371/journal.pone.0166187), 2016-11-09
Supplement: pone.0166187.s003.pdf [file pone.0166187.s003.pdf]

## S3 Figure

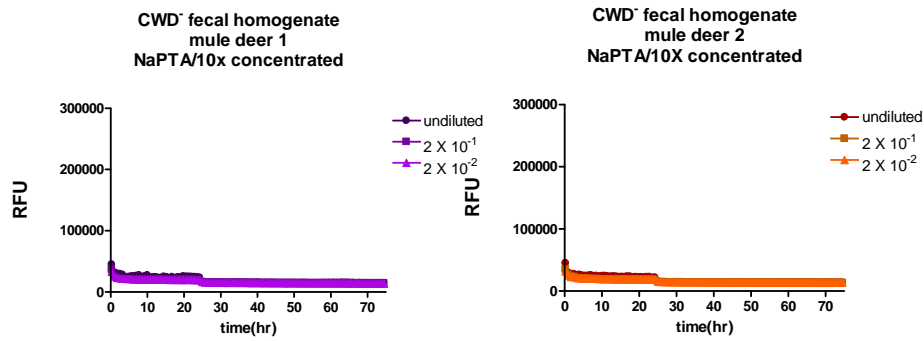

**RT-QuIC with fecal homogenates of CWD-negative deer.** As further negative controls, fecal homogenates of CWD-negative deer were subjected to NaPTA precipitation and 10fold concentration. Serial dilutions were used to seed RT-QuIC reactions with mouse rPrP and substrate replacement. Reactions were set up in quadruplicate, average ThT fluorescence is shown over the time course of the reaction.
